# Supplementary material for: Unexpected discovery of estrone in the rotational spectrum of estradiol: a systematic investigation of a CP-FTMW spectrum
Source: Royal Society of Chemistry journal article supplement (doi:10.1039/d1cp04903h), 2022-01-01
Supplement: d1cp04903h1.pdf [file d1cp04903h1.pdf]

Supplementary information for:

## Unexpected discovery of estrone in the rotational spectrum of estradiol: A systematic investigation of a CP-FTMW spectrum

Pablo Pinacho<sup>+,a</sup>, Swantje V. M. Caliebe<sup>+,a,b</sup>, María Mar Quesada-Moreno,<sup>c</sup> Sabrina Zinn,<sup>a</sup> and Melanie Schnell.<sup>a,b</sup>

Affiliations: a) Deutsches Elektronen-Synchrotron DESY, Notkestr. 85, 22607 Hamburg, Germany.

b) Christian-Albrechts-Universität zu Kiel, Institut für Physikalische Chemie, Max-Eyth-Str. 1, 24118 Kiel, Germany.

c) Departamento de Química Inorgánica, Facultad de Ciencias, Universidad de Granada, Avda. Fuentenueva s/n, 18071, Granada, Spain.

<sup>+</sup> These authors contributed equally to this work.

### Abstract

We report the reinvestigation of the high-resolution rotational spectrum of estradiol. After removing the known spectral lines corresponding to three conformers of estradiol identified in the gas phase before, a large number of spectral lines remained unassigned in the spectrum. The observation of remaining lines is a common feature in spectra obtained by broadband rotational spectroscopy. In our reinvestigation, the detection of certain patterns resulted in two new sets of experimental rotational constants. Here we describe a systematic analysis, which together with quantum-chemical computations culminated in the assignment of two estrone conformers, namely exhibiting the *trans*- and the *cis*-arrangement of the hydroxy group attached to the rigid steroid backbone. Estrone and estradiol only differ in two atomic mass units, and they show a dynamic interconversion equilibrium under certain conditions, which might also have been the case in our experiments due to the heating temperature of 195°C. The results illustrate the potential of high-resolution rotational spectroscopy to discern between structurally related molecules and to provide their gas-phase structures without information beforehand exploiting the benefit of having remaining unassigned rotational transitions in the spectrum.

### Table of contents:

- [Figure S1](#). Scheme of the 16 different diastereomers of estradiol.
- [Figure S2](#). The two configurations of estrone.
- [Figure S3](#). Overlay of estrone 1 and estrone 2.
  
- [Table S1](#). Predicted rotational parameters for the 16 diastereomers of estradiol.
- [Table S2](#). Predicted rotational parameters for the six rotamers of estradiol RSRSR.
- [Table S3](#). Predicted rotational parameters for the two conformations of estrone.
- [Table S4](#). Observed frequencies for *trans*-estrone.
- [Table S5](#). Observed frequencies for *cis*-estrone.

**Figure S1.** The 16 different diastereomers of estradiol. The corresponding enantiomer would have the opposite configuration for the five chiral centers and, thus, would have the same set of rotational constants. Estradiol-17 $\beta$  (RSSSS) and the diastereomer RSRSR are highlighted with dashed boxes.

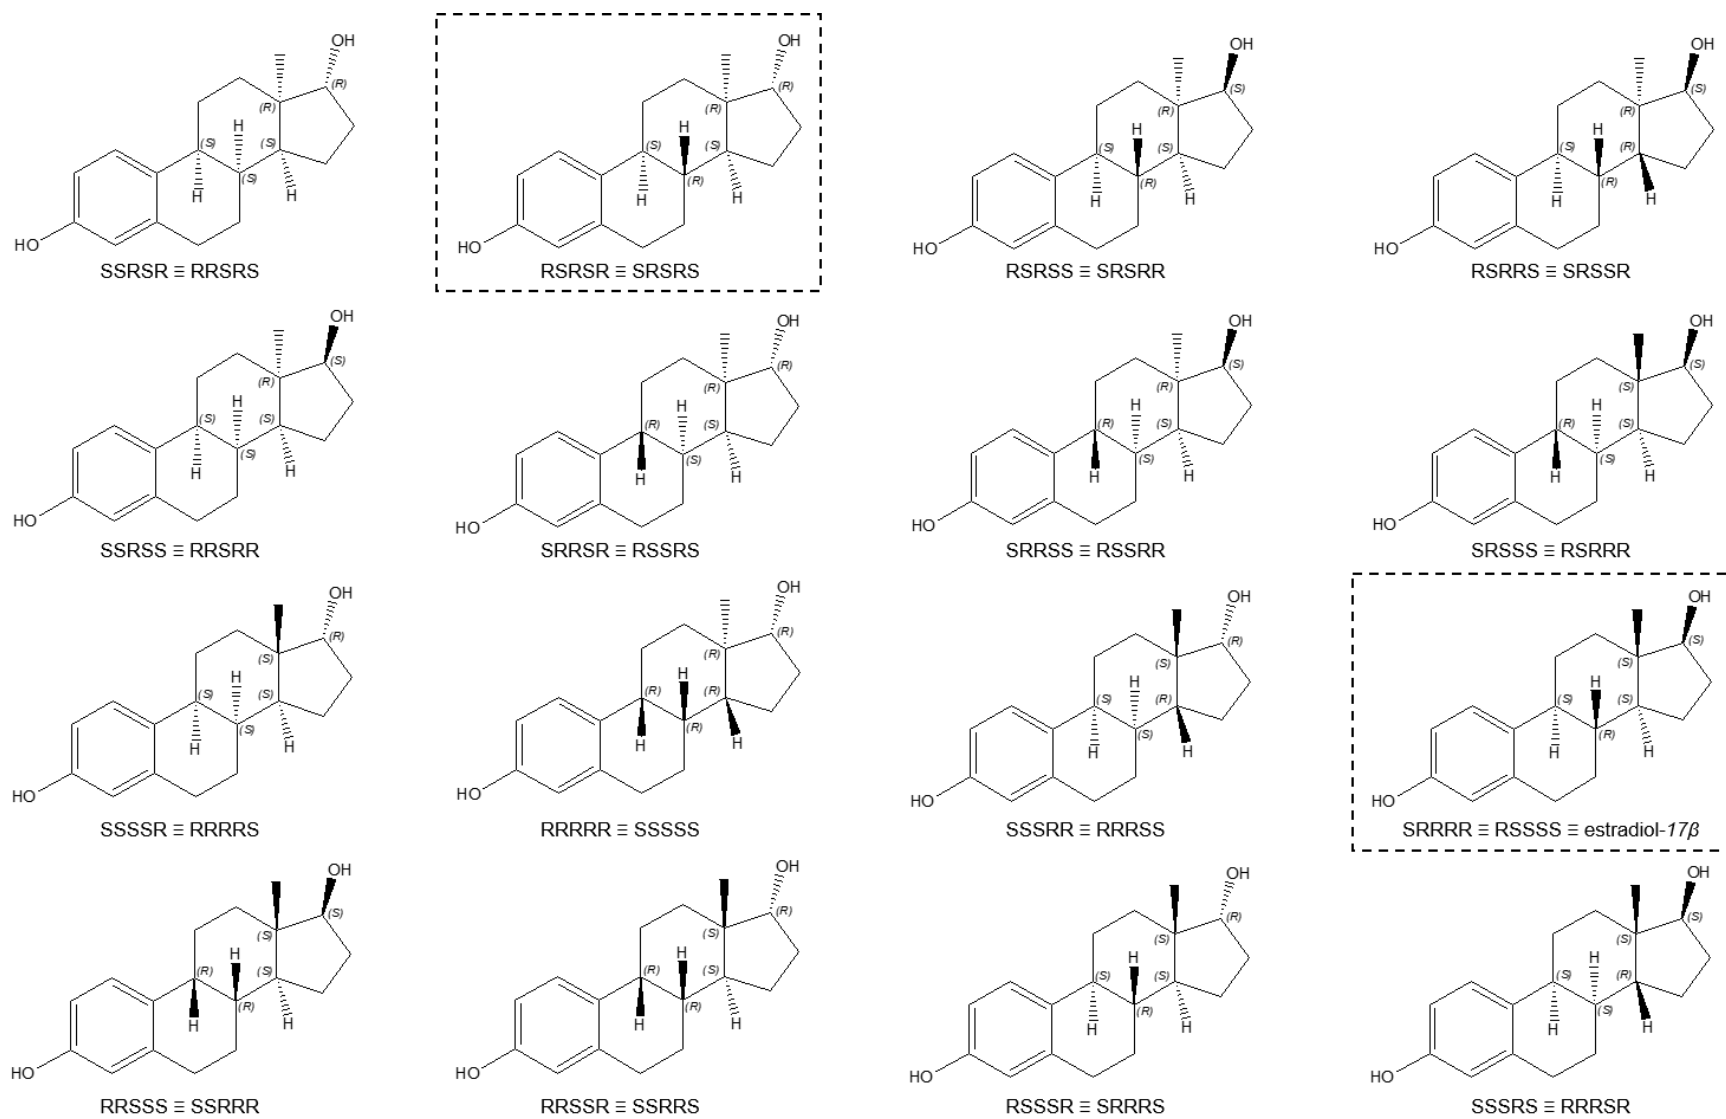

**Figure S2.** The two configurations of estrone, showing the *trans* and *cis* arrangements of their OH groups.

*trans*-estrone 1

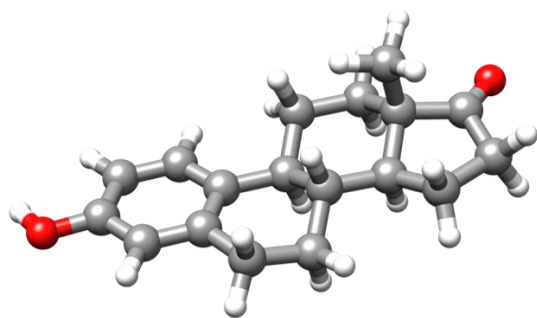

*cis*-estrone 1

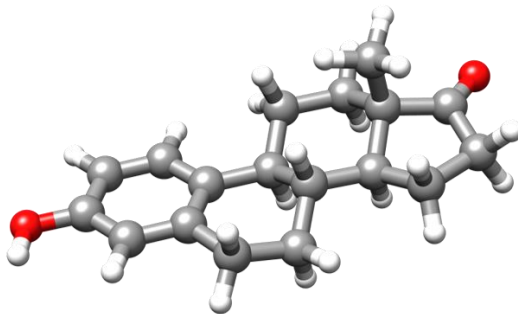

*trans*-estrone 2

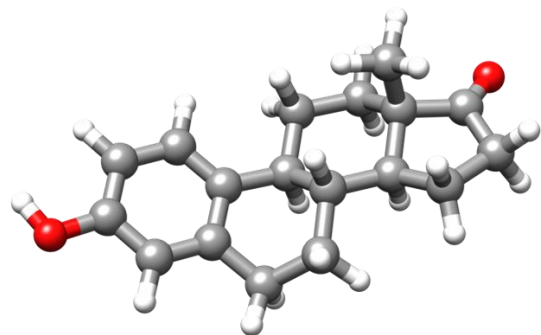

*cis*-estrone 2

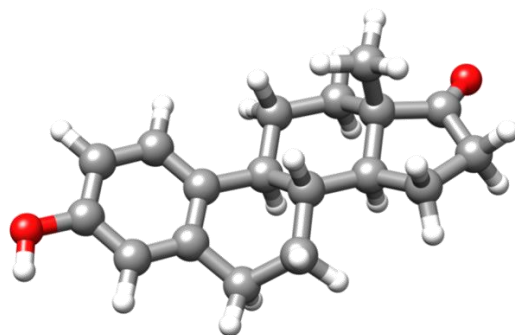

**Figure S3.** Overlay of the *trans* forms for estrone 1 (blue atoms) and estrone 2 (gold atoms) to illustrate the differences in their backbones.

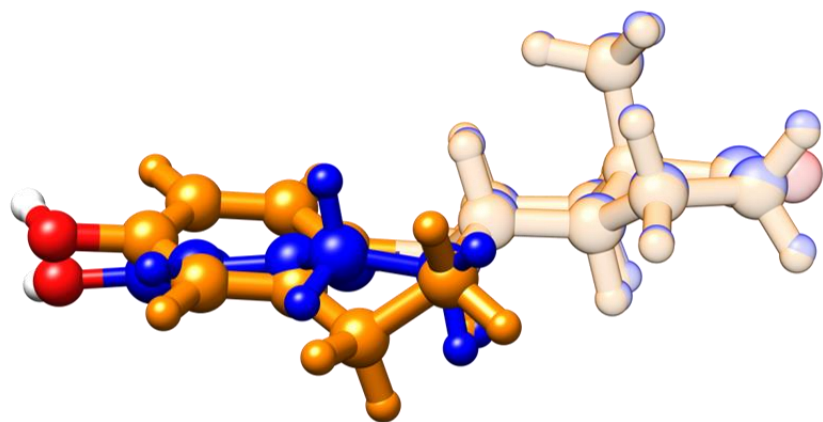

*trans*-estrone 1

*trans*-estrone 2

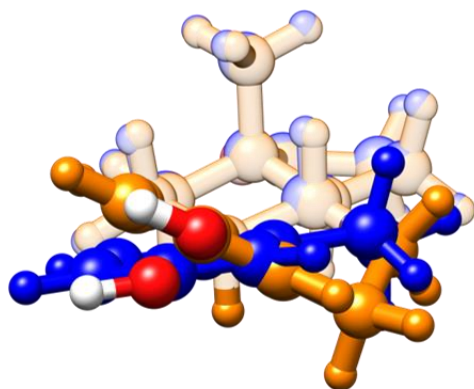

**Table S1.** Predicted rotational parameters for the 16 estradiol diastereomers at the B3LYP-D3(BJ)/def2-TZVP level of theory named by the configuration (R or S) of the five chiral centers (C8-C9-C13-C14-C17, Figure 1 for atom labelling). A conformational search was performed by CREST for each diastereomer, and only the lowest energy rotamer was optimized and shown in this table. The name of the rotamer is given according to the orientation of both -OH groups, t and c stands for *trans* and *cis* respectively, gp, gm and a stand for *gauche*(+), *gauche*(-) and *anti*, respectively. The diastereomers highlighted in pale orange have been synthesized previously [Reference 26 in manuscript]. Rotational constants highlighted in pale green mean those are similar to the experimental rotational constants for new-a and new-b. Only two structures fulfill both criteria, RSSSS (estradiol-17 $\beta$ ) and RSRSR.

| Configuration                   | SRRSS             | SRRSR            | RRRSS             | RRRSR           | RSSSR<br>estradiol-17 $\alpha$ | RSSSS<br>estradiol-17 $\beta$ | RSRSR           | RSRSS            |
|---------------------------------|-------------------|------------------|-------------------|-----------------|--------------------------------|-------------------------------|-----------------|------------------|
| Rotamer                         | ca                | tgp              | ca                | tgp             | tgp                            | tgp                           | ca              | ta               |
| A /MHz <sup>a</sup>             | 903.5             | 938.3            | 926.3             | 968.9           | 906.4                          | 943.7                         | 945.3           | 886.0            |
| B /MHz                          | 177.1             | 176.0            | 175.4             | 175.0           | 179.5                          | 175.0                         | 177.7           | 180.0            |
| C /MHz                          | 163.2             | 164.0            | 167.6             | 167.3           | 161.6                          | 155.4                         | 159.4           | 160.6            |
| B-C /MHz                        | 13.9              | 12.0             | 7.8               | 7.7             | 17.9                           | 19.6                          | 18.2            | 19.4             |
| P <sub>a</sub> /uÅ <sup>2</sup> | 2695.5            | 2707.2           | 2675.5            | 2693.5          | 2694.4                         | 2802.4                        | 2739.9          | 2692.0           |
| P <sub>b</sub> /uÅ <sup>2</sup> | 401.2             | 374.4            | 339.8             | 327.3           | 434.9                          | 449.4                         | 430.6           | 454.8            |
| P <sub>c</sub> /uÅ <sup>2</sup> | 158.1             | 164.2            | 205.7             | 194.4           | 122.7                          | 86.2                          | 104.1           | 115.6            |
| $\mu_a \mu_b \mu_c$ /D          | -0.94 -1.79 -0.35 | 1.02 -0.43 -1.00 | -0.85 -1.23 -0.71 | 1.03 1.20 -0.93 | -0.56 0.17 -0.33               | 1.13 -2.41 -0.79              | 0.07 -0.35 0.21 | 0.88 -0.26 -0.26 |
| R $\mu_a \mu_b$                 | 0.53 1            | 1 0.42           | 0.69 1            | 0.86 1          | 1 0.30                         | 0.47 1                        | 0.21 1          | 1 0.30           |

| Configuration                   | RRSRR                      | RRRRS             | RRRRR            | RRSSR                      | RRSSS                      | RRRSR           | SRSSR          | SRSSS            |
|---------------------------------|----------------------------|-------------------|------------------|----------------------------|----------------------------|-----------------|----------------|------------------|
| Rotamer                         | tgp                        | ta                | tgp              | ta                         | tgp                        | ta              | tgp            | ta               |
| A /MHz                          | 624.7 / 860.8 <sup>b</sup> | 943.7             | 994.8            | 605.2 / 919.0 <sup>b</sup> | 635.9 / 963.2 <sup>b</sup> | 888.3           | 889.3          | 957.2            |
| B /MHz                          | 243.2 / 196.1              | 179.2             | 173.1            | 236.6 / 179.6              | 220.3 / 174.6              | 185.1           | 184.1          | 177.1            |
| C /MHz                          | 219.1 / 181.2              | 164.6             | 159.7            | 230.9 / 163.6              | 209.9 / 155.8              | 170.9           | 168.1          | 162.5            |
| B-C /MHz                        | 24.1                       | 14.6              | 13.5             | 5.8                        | 10.4                       | 14.2            | 15.9           | 14.6             |
| P <sub>a</sub> /uÅ <sup>2</sup> | 1788.7                     | 2679.2            | 2789.0           | 1745.2                     | 1953.5                     | 2559.3          | 2592.4         | 2717.8           |
| P <sub>b</sub> /uÅ <sup>2</sup> | 518.9                      | 393.0             | 377.5            | 444.4                      | 454.2                      | 397.9           | 414.0          | 392.2            |
| P <sub>c</sub> /uÅ <sup>2</sup> | 290.2                      | 142.6             | 130.5            | 390.8                      | 340.5                      | 171.0           | 154.2          | 135.8            |
| $\mu_a \mu_b \mu_c$ /D          | 1.69 1.92 0.59             | -0.52 -0.26 -0.47 | -0.43 0.35 -0.20 | -0.10 0.69 -1.42           | 0.12 -0.37 1.53            | 0.39 0.74 -1.88 | 0.39 0.24 0.36 | -0.35 -0.33 0.10 |
| R $\mu_a \mu_b$                 | 0.88 1                     | 1 0.50            | 1 0.81           | 0.14 1                     | 0.32 1                     | 0.53 1          | 1 0.62         | 1 0.94           |

<sup>a</sup> A, B and C are the rotational constants. P <sub>$\alpha$</sub>  ( $\alpha = a, b$  or  $c$ ) are the planar moments of inertia; P<sub>a</sub> = (I<sub>b</sub>+I<sub>c</sub>-I<sub>a</sub>)/2.  $\mu_\alpha$  ( $\alpha = a, b$  or  $c$ ) are the electric dipole moment components, 1 D = 3.33·10<sup>-30</sup> C·m. R  $\mu_a|\mu_b$  is the ratio of the dipole moment components estimated from quantum-chemical calculations. <sup>b</sup> For the RRSRR, RRSSR and RRSSS diastereomers the CREST search predicted two conformations for the backbone close in energy. The lowest in energy has a “non-planar” backbone, which explains the large difference in the rotation constants relative to the other diastereomers. The “planar” backbone structure was also considered, their rotational constants are shown in the table after the slash. The planar moments of inertia and the dipole moment components are given for the lowest energy structure, the “non-planar” one.

**Table S2.** Predicted rotational parameters for the six rotamers of estradiol RSRSR at the B3LYP-D3(BJ)/def2-TZVP level of theory. The rotamers are sorted by increasing energy, note that the order is different to the rotamers of estradiol-17 $\beta$ .

|                                               | <i>Cis-anti</i><br>(ca) | <i>Trans-anti</i><br>(ta) | <i>cis-gauche(-)</i><br>(cgm) | <i>trans-gauche(-)</i><br>(tgm) | <i>trans-gauche(+)</i><br>(tgp) | <i>cis-gauche(+)</i><br>(cgp) |
|-----------------------------------------------|-------------------------|---------------------------|-------------------------------|---------------------------------|---------------------------------|-------------------------------|
| <i>A</i> /MHz <sup>a</sup>                    | 945.3                   | 945.8                     | 944.6                         | 945.1                           | 944.7                           | 944.2                         |
| <i>B</i> /MHz                                 | 177.7                   | 177.6                     | 178.0                         | 178.0                           | 177.5                           | 177.5                         |
| <i>C</i> /MHz                                 | 159.4                   | 159.4                     | 159.8                         | 159.8                           | 159.3                           | 159.3                         |
| <i>B-C</i> /MHz                               | 18.2                    | 18.2                      | 18.2                          | 18.2                            | 18.2                            | 18.2                          |
| <i>P</i> <sub>a</sub> /uÅ <sup>2</sup>        | 2739.9                  | 2740.9                    | 2733.4                        | 2733.5                          | 2742.4                          | 2742.2                        |
| <i>P</i> <sub>b</sub> /uÅ <sup>2</sup>        | 430.6                   | 429.6                     | 429.2                         | 429.1                           | 430.1                           | 430.3                         |
| <i>P</i> <sub>c</sub> /uÅ <sup>2</sup>        | 104.1                   | 104.7                     | 105.8                         | 105.7                           | 104.8                           | 105.0                         |
| $\mu_a \mu_b \mu_c$ /D                        | 0.07 -0.35 0.21         | 0.29 -2.19 -0.10          | -1.09 1.95 -1.31              | 0.87 -0.58 -1.22                | 0.90 -0.10 -0.05                | 0.68 2.44 -0.15               |
| <i>R</i> $\mu_a \mu_b$                        | 0.21 1                  | 0.13 1                    | 0.56 1                        | 1 0.67                          | 1 0.11                          | 0.28 1                        |
| $\Delta E_{\text{ZPE}}$ /cm <sup>-1</sup>     | 0.00                    | 10.89                     | 131.16                        | 135.27                          | 337.17                          | 340.15                        |
| $\Delta E_{\text{ZPE}}$ /kJ·mol <sup>-1</sup> | 0.00                    | 0.13                      | 1.57                          | 1.62                            | 4.03                            | 4.07                          |

<sup>a</sup> see [Table S1](#) for definitions.

**Table S3.** Predicted rotational parameters for the two estrone conformations at the B3LYP-D3(BJ)/def2-TZVP level of theory. Each of the conformations presents two forms, *trans* or *cis*, due to the arrangement of the OH group at C3.

|                                               | <i>Trans</i> -estrone 1 | <i>Cis</i> -estrone 1 | <i>Trans</i> -estrone 2 | <i>Cis</i> -estrone 2 |
|-----------------------------------------------|-------------------------|-----------------------|-------------------------|-----------------------|
| <i>A</i> /MHz <sup>a</sup>                    | 943.4                   | 943.0                 | 918.8                   | 918.5                 |
| <i>B</i> /MHz                                 | 179.7                   | 179.6                 | 183.1                   | 183.1                 |
| <i>C</i> /MHz                                 | 159.2                   | 159.2                 | 163.6                   | 163.6                 |
| <i>B-C</i> /MHz                               | 20.5                    | 20.5                  | 19.5                    | 19.5                  |
| <i>P</i> <sub>a</sub> /uÅ <sup>2</sup>        | 2725.6                  | 2725.9                | 2649.0                  | 2649.8                |
| <i>P</i> <sub>b</sub> /uÅ <sup>2</sup>        | 448.7                   | 448.8                 | 439.5                   | 439.8                 |
| <i>P</i> <sub>c</sub> /uÅ <sup>2</sup>        | 87.0                    | 87.1                  | 110.5                   | 110.4                 |
| $\mu_a \mu_b \mu_c$ /D                        | 1.91 -0.93 0.38         | -1.72 3.46 0.74       | -1.89 0.68 1.02         | 1.80 -3.21 0.65       |
| R $\mu_a \mu_b$                               | 1 0.49                  | 0.50 1                | 1 0.36                  | 0.56 1                |
| $\Delta E_{\text{ZPE}}$ /cm <sup>-1</sup>     | 0                       | 21.93                 | 580.94                  | 631.81                |
| $\Delta E_{\text{ZPE}}$ /kJ·mol <sup>-1</sup> | 0                       | 0.26                  | 6.95                    | 7.56                  |

<sup>a</sup> see [Table S1](#) for definitions.

**Table S4.** Observed frequencies and residuals (MHz) for *trans*-estrone for  $J'K_{-1}'K_{+1}' \leftarrow J''K_{-1}''K_{+1}''$  transitions.

| $J'K_{-1}'K_{+1}'$ | $J''K_{-1}''K_{+1}''$ | Obs.      | Res.    | $J'K_{-1}'K_{+1}'$ | $J''K_{-1}''K_{+1}''$ | Obs.      | Res.    | $J'K_{-1}'K_{+1}'$ | $J''K_{-1}''K_{+1}''$ | Obs.      | Res.    |
|--------------------|-----------------------|-----------|---------|--------------------|-----------------------|-----------|---------|--------------------|-----------------------|-----------|---------|
| 8 0 8              | 7 0 7                 | 2677.3885 | -0.0030 | 16 1 15            | 15 1 14               | 5494.9073 | 0.0070  | 17 2 15            | 16 2 14               | 5911.2794 | -0.0067 |
| 9 0 9              | 8 0 8                 | 3003.0854 | -0.0030 | 17 1 17            | 16 1 16               | 5528.3414 | -0.0014 | 18 2 17            | 17 2 16               | 6036.4162 | -0.0043 |
| 10 0 10            | 9 0 9                 | 3326.4033 | -0.0032 | 17 1 16            | 16 1 15               | 5823.7090 | 0.0013  | 18 2 16            | 17 2 15               | 6261.0725 | -0.0092 |
| 11 0 11            | 10 0 10               | 3647.5846 | -0.0017 | 18 1 18            | 17 1 17               | 5848.7707 | 0.0063  | 19 2 18            | 18 2 17               | 6364.7638 | -0.0023 |
| 12 0 12            | 11 0 11               | 3966.9825 | -0.0017 | 18 1 17            | 17 1 16               | 6149.7808 | 0.0075  | 19 2 17            | 18 2 16               | 6609.0333 | -0.0062 |
| 13 0 13            | 12 0 12               | 4285.0058 | -0.0142 | 19 1 19            | 18 1 18               | 6168.8275 | -0.0023 | 20 2 18            | 19 2 17               | 6954.9545 | 0.0125  |
| 14 0 14            | 13 0 13               | 4602.1216 | 0.0029  | 19 1 18            | 18 1 17               | 6473.1823 | 0.0133  | 21 2 20            | 20 2 19               | 7018.6920 | -0.0015 |
| 16 0 16            | 15 0 15               | 5234.9518 | 0.0025  | 20 1 20            | 19 1 19               | 6488.5785 | -0.0090 | 6 3 3              | 5 3 2                 | 2035.0617 | 0.0031  |
| 17 0 17            | 16 0 16               | 5551.2106 | 0.0032  | 20 1 19            | 19 1 18               | 6794.0922 | 0.0033  | 8 3 6              | 7 3 5                 | 2714.4995 | 0.0033  |
| 18 0 18            | 17 0 17               | 5867.5798 | 0.0022  | 21 1 21            | 20 1 20               | 6808.0778 | -0.0051 | 8 3 5              | 7 3 4                 | 2715.7629 | 0.0002  |
| 20 0 20            | 19 0 19               | 6500.9328 | 0.0019  | 21 1 20            | 20 1 19               | 7112.8388 | -0.0035 | 9 3 7              | 8 3 6                 | 3054.6689 | -0.0049 |
| 21 0 21            | 20 0 20               | 6817.9586 | 0.0048  | 6 2 5              | 5 2 4                 | 2030.8500 | -0.0034 | 9 3 6              | 8 3 5                 | 3056.9824 | -0.0049 |
| 6 1 5              | 5 1 4                 | 2090.5234 | 0.0089  | 6 2 4              | 5 2 3                 | 2044.8980 | 0.0030  | 10 3 8             | 9 3 7                 | 3395.0346 | 0.0033  |
| 7 1 7              | 6 1 6                 | 2294.9999 | -0.0095 | 7 2 6              | 6 2 5                 | 2368.3079 | 0.0043  | 10 3 7             | 9 3 6                 | 3398.9760 | -0.0009 |
| 7 1 6              | 6 1 5                 | 2437.2364 | -0.0005 | 7 2 5              | 6 2 4                 | 2390.5323 | -0.0035 | 11 3 9             | 10 3 8                | 3735.5191 | -0.0061 |
| 8 1 8              | 7 1 7                 | 2621.0944 | -0.0047 | 8 2 7              | 7 2 6                 | 2705.2846 | 0.0023  | 11 3 8             | 10 3 7                | 3741.8903 | -0.0023 |
| 8 1 7              | 7 1 6                 | 2783.1080 | 0.0042  | 8 2 6              | 7 2 5                 | 2738.1174 | 0.0031  | 12 3 10            | 11 3 9                | 4076.1021 | 0.0028  |
| 9 1 9              | 8 1 8                 | 2946.5734 | -0.0012 | 9 2 8              | 8 2 7                 | 3041.7217 | -0.0028 | 12 3 9             | 11 3 8                | 4085.9100 | -0.0027 |
| 9 1 8              | 8 1 7                 | 3127.9425 | 0.0014  | 9 2 7              | 8 2 6                 | 3087.6185 | 0.0031  | 13 3 11            | 12 3 10               | 4416.6832 | -0.0003 |
| 10 1 10            | 9 1 9                 | 3271.4119 | -0.0011 | 10 2 9             | 9 2 8                 | 3377.5707 | 0.0032  | 13 3 10            | 12 3 9                | 4431.2234 | -0.0029 |
| 10 1 9             | 9 1 8                 | 3471.5535 | -0.0019 | 10 2 8             | 9 2 7                 | 3438.8740 | 0.0024  | 14 3 12            | 13 3 11               | 4757.2001 | 0.0027  |
| 11 1 11            | 10 1 10               | 3595.6042 | -0.0020 | 11 2 10            | 10 2 9                | 3712.7517 | 0.0016  | 14 3 11            | 13 3 10               | 4778.0272 | 0.0038  |
| 11 1 10            | 10 1 9                | 3813.7381 | 0.0036  | 11 2 9             | 10 2 8                | 3791.5633 | -0.0017 | 15 3 13            | 14 3 12               | 5097.5456 | -0.0063 |
| 12 1 12            | 11 1 11               | 3919.1579 | -0.0023 | 12 2 11            | 11 2 10               | 4047.2184 | 0.0032  | 15 3 12            | 14 3 11               | 5126.4785 | 0.0001  |
| 12 1 11            | 11 1 10               | 4154.2460 | -0.0021 | 12 2 10            | 11 2 9                | 4145.2568 | 0.0002  | 16 3 14            | 15 3 13               | 5437.6610 | 0.0084  |
| 13 1 13            | 12 1 12               | 4242.0922 | -0.0018 | 13 2 12            | 12 2 11               | 4380.9052 | -0.0045 | 16 3 13            | 15 3 12               | 5476.7267 | -0.0019 |
| 13 1 12            | 12 1 11               | 4492.8526 | -0.0026 | 13 2 11            | 12 2 10               | 4499.4381 | 0.0005  | 17 3 15            | 16 3 14               | 5777.3908 | -0.0102 |
| 14 1 14            | 13 1 13               | 4564.4365 | -0.0009 | 14 2 13            | 13 2 12               | 4713.7877 | 0.0012  | 17 3 14            | 16 3 13               | 5828.8347 | -0.0121 |
| 14 1 13            | 13 1 12               | 4829.3093 | -0.0034 | 14 2 12            | 13 2 11               | 4853.5847 | -0.0013 | 18 3 15            | 17 3 14               | 6182.8163 | 0.0030  |
| 15 1 15            | 14 1 14               | 4886.2328 | 0.0034  | 15 2 13            | 14 2 12               | 5207.2154 | 0.0004  | 19 3 17            | 18 3 16               | 6455.4536 | 0.0025  |
| 15 1 14            | 14 1 13               | 5163.3951 | 0.0031  | 16 2 15            | 15 2 14               | 5376.9292 | -0.0013 | 20 3 18            | 19 3 17               | 6793.5638 | 0.0000  |
| 16 1 16            | 15 1 15               | 5207.5082 | -0.0065 | 16 2 14            | 15 2 13               | 5559.9059 | 0.0061  | 22 3 20            | 21 3 19               | 7467.5304 | -0.0062 |



**Table S4.** Continued.

| $J'K_{-1}K_{+1}$ | $J''K_{-1}K_{+1}$ | Obs.      | Res.    | $J'K_{-1}K_{+1}$ | $J''K_{-1}K_{+1}$ | Obs.      | Res.    | $J'K_{-1}K_{+1}$ | $J''K_{-1}K_{+1}$ | Obs.      | Res.    |
|------------------|-------------------|-----------|---------|------------------|-------------------|-----------|---------|------------------|-------------------|-----------|---------|
| 6 4 3            | 5 4 2             | 2034.0526 | -0.0100 | 7 1 7            | 6 0 6             | 2871.9202 | -0.0083 | 7 4 4            | 6 3 3             | 7753.4280 | -0.0030 |
| 6 4 2            | 5 4 1             | 2034.0526 | -0.0100 | 8 1 8            | 7 0 7             | 3143.8108 | 0.0054  | 7 4 3            | 6 3 4             | 7753.8662 | 0.0024  |
| 7 4 4            | 6 4 3             | 2373.4805 | -0.0033 | 9 1 9            | 8 0 8             | 3412.9820 | -0.0064 |                  |                   |           |         |
| 7 4 3            | 6 4 2             | 2373.4805 | -0.0033 | 10 1 10          | 9 0 9             | 3681.3189 | 0.0057  |                  |                   |           |         |
| 9 4 6            | 8 4 5             | 3052.9299 | 0.0061  | 11 1 11          | 10 0 10           | 3950.5146 | 0.0017  |                  |                   |           |         |
| 9 4 5            | 8 4 4             | 3052.9299 | 0.0061  | 12 1 12          | 11 0 11           | 4222.0886 | 0.0018  |                  |                   |           |         |
| 10 4 7           | 9 4 6             | 3392.9428 | -0.0105 | 13 1 13          | 12 0 12           | 4497.1923 | -0.0042 |                  |                   |           |         |
| 10 4 6           | 9 4 5             | 3393.0445 | 0.0019  | 14 1 14          | 13 0 13           | 4776.6177 | 0.0037  |                  |                   |           |         |
| 12 4 9           | 11 4 8            | 4073.8347 | 0.0041  | 10 0 10          | 9 1 9             | 2916.5052 | -0.0013 |                  |                   |           |         |
| 12 4 8           | 11 4 7            | 4074.1701 | 0.0068  | 12 0 12          | 11 1 11           | 3664.0623 | 0.0045  |                  |                   |           |         |
| 13 4 10          | 12 4 9            | 4414.6889 | 0.0027  | 16 0 16          | 15 1 15           | 5092.8879 | 0.0030  |                  |                   |           |         |
| 13 4 9           | 12 4 8            | 4415.2740 | -0.0015 | 17 0 17          | 16 1 16           | 5436.5654 | -0.0120 |                  |                   |           |         |
| 14 4 11          | 13 4 10           | 4755.8284 | -0.0018 | 19 0 19          | 18 1 18           | 6111.2019 | 0.0139  |                  |                   |           |         |
| 15 4 12          | 14 4 11           | 5097.2701 | 0.0074  | 6 2 5            | 5 1 4             | 4186.1726 | 0.0051  |                  |                   |           |         |
| 15 4 11          | 14 4 10           | 5098.8831 | -0.0031 | 10 2 9           | 9 1 8             | 5240.2440 | -0.0047 |                  |                   |           |         |
| 16 4 13          | 15 4 12           | 5438.9828 | 0.0072  | 4 3 1            | 3 2 2             | 5200.6832 | 0.0044  |                  |                   |           |         |
| 16 4 12          | 15 4 11           | 5441.5242 | -0.0045 | 5 3 3            | 4 2 2             | 5535.0034 | 0.0026  |                  |                   |           |         |
| 17 4 14          | 16 4 13           | 5780.9584 | 0.0066  | 5 3 2            | 4 2 3             | 5541.2238 | -0.0011 |                  |                   |           |         |
| 17 4 13          | 16 4 12           | 5784.8469 | -0.0002 | 6 3 4            | 5 2 3             | 5868.6891 | -0.0134 |                  |                   |           |         |
| 18 4 15          | 17 4 14           | 6123.1589 | -0.0054 | 6 3 3            | 5 2 4             | 5883.2913 | 0.0061  |                  |                   |           |         |
| 18 4 14          | 17 4 13           | 6128.9546 | 0.0057  | 7 3 5            | 6 2 4             | 6198.3399 | 0.0065  |                  |                   |           |         |
| 9 5 5            | 8 5 4             | 3051.6945 | 0.0072  | 7 3 4            | 6 2 5             | 6227.5957 | 0.0033  |                  |                   |           |         |
| 9 5 4            | 8 5 3             | 3051.6945 | 0.0072  | 8 3 6            | 7 2 5             | 6522.3022 | 0.0084  |                  |                   |           |         |
| 10 5 6           | 9 5 5             | 3391.3055 | 0.0057  | 9 3 6            | 8 2 7             | 6926.7660 | 0.0094  |                  |                   |           |         |
| 10 5 5           | 9 5 4             | 3391.3055 | 0.0057  | 10 3 8           | 9 2 7             | 7146.2834 | 0.0141  |                  |                   |           |         |
| 11 5 7           | 10 5 6            | 3731.0947 | 0.0127  | 11 3 8           | 10 2 9            | 7648.3298 | -0.0044 |                  |                   |           |         |
| 11 5 6           | 10 5 5            | 3731.0947 | 0.0127  | 4 4 1            | 3 3 0             | 6737.4358 | -0.0102 |                  |                   |           |         |
| 12 5 8           | 11 5 7            | 4071.0500 | -0.0014 | 4 4 0            | 3 3 1             | 6737.4358 | -0.0102 |                  |                   |           |         |
| 12 5 7           | 11 5 6            | 4071.0500 | -0.0014 | 5 4 2            | 4 3 1             | 7076.2999 | 0.0015  |                  |                   |           |         |
| 15 5 11          | 14 5 10           | 5092.2397 | -0.0181 | 5 4 1            | 4 3 2             | 7076.3283 | -0.0058 |                  |                   |           |         |
| 15 5 10          | 14 5 9            | 5092.2397 | -0.0181 | 6 4 3            | 5 3 2             | 7415.0038 | -0.0050 |                  |                   |           |         |
| 6 1 6            | 5 0 5             | 2595.5561 | -0.0006 | 6 4 2            | 5 3 3             | 7415.1466 | -0.0060 |                  |                   |           |         |

**Table S5.** Observed frequencies and residuals (MHz) for *cis*-estrone for  $J'K_{-1}'K_{+1}' \leftarrow J''K_{-1}''K_{+1}''$  transitions.

| $J'K_{-1}'K_{+1}'$ | $J''K_{-1}''K_{+1}''$ | Obs.      | Res.    | $J'K_{-1}'K_{+1}'$ | $J''K_{-1}''K_{+1}''$ | Obs.      | Res.    | $J'K_{-1}'K_{+1}'$ | $J''K_{-1}''K_{+1}''$ | Obs.      | Res.    |
|--------------------|-----------------------|-----------|---------|--------------------|-----------------------|-----------|---------|--------------------|-----------------------|-----------|---------|
| 10 0 10            | 9 0 9                 | 3325.8938 | -0.0071 | 17 3 15            | 16 3 14               | 5776.5313 | -0.0106 | 6 2 5              | 5 1 4                 | 4184.6514 | -0.0018 |
| 11 0 11            | 10 0 10               | 3647.0249 | -0.0064 | 13 4 10            | 12 4 9                | 4414.0257 | -0.0066 | 7 2 6              | 6 1 5                 | 4462.4144 | 0.0082  |
| 12 0 12            | 11 0 11               | 3966.3901 | 0.0095  | 13 4 9             | 12 4 8                | 4414.6241 | 0.0018  | 8 2 7              | 7 1 6                 | 4730.4192 | 0.0016  |
| 13 0 13            | 12 0 12               | 4284.3531 | -0.0156 | 15 4 12            | 14 4 11               | 5096.5120 | 0.0030  | 9 2 8              | 8 1 7                 | 4989.0066 | -0.0005 |
| 15 0 15            | 14 0 14               | 4917.9129 | -0.0034 | 16 4 12            | 15 4 11               | 5440.7303 | 0.0036  | 10 2 9             | 9 1 8                 | 5238.6116 | 0.0067  |
| 7 1 6              | 6 1 5                 | 2436.8600 | -0.0071 | 13 5 9             | 12 5 8                | 4410.5674 | -0.0040 | 10 2 8             | 9 1 9                 | 6342.6084 | -0.0140 |
| 8 1 7              | 7 1 6                 | 2782.6944 | 0.0134  | 13 5 8             | 12 5 7                | 4410.5674 | -0.0040 | 11 2 10            | 10 1 9                | 5479.7704 | -0.0032 |
| 9 1 9              | 8 1 8                 | 2946.1411 | -0.0006 | 4 1 4              | 3 0 3                 | 2022.3624 | 0.0039  | 13 2 12            | 12 1 11               | 5939.8759 | 0.0023  |
| 9 1 8              | 8 1 7                 | 3127.4689 | 0.0038  | 5 1 5              | 4 0 4                 | 2312.4217 | 0.0161  | 14 2 13            | 13 1 12               | 6160.7896 | 0.0007  |
| 15 1 15            | 14 1 14               | 4885.5108 | 0.0007  | 7 1 7              | 6 0 6                 | 2871.2106 | -0.0165 | 15 2 14            | 14 1 13               | 6377.2661 | -0.0024 |
| 15 1 14            | 14 1 13               | 5162.5961 | 0.0036  | 8 1 8              | 7 0 7                 | 3143.0754 | 0.0019  | 17 2 16            | 16 1 15               | 6803.0413 | 0.0054  |
| 12 2 10            | 11 2 9                | 4144.6500 | -0.0001 | 9 1 9              | 8 0 8                 | 3412.2321 | 0.0032  | 18 2 17            | 17 1 16               | 7015.7459 | -0.0036 |
| 13 2 11            | 12 2 10               | 4498.7774 | -0.0004 | 10 1 10            | 9 0 9                 | 3680.5295 | 0.0012  | 19 2 18            | 18 1 17               | 7230.7430 | -0.0044 |
| 14 2 13            | 13 2 12               | 4713.0794 | -0.0004 | 11 1 11            | 10 0 10               | 3949.7071 | 0.0023  | 20 2 19            | 19 1 18               | 7449.7875 | 0.0157  |
| 14 2 12            | 13 2 11               | 4852.8669 | -0.0051 | 12 1 12            | 11 0 11               | 4221.2525 | -0.0045 | 21 2 20            | 20 1 19               | 7674.3773 | -0.0108 |
| 15 2 13            | 14 2 12               | 5206.4283 | -0.0174 | 13 1 13            | 12 0 12               | 4496.3451 | -0.0010 | 22 2 21            | 21 1 20               | 7905.8689 | -0.0123 |
| 16 2 14            | 15 2 13               | 5559.0738 | -0.0009 | 14 1 14            | 13 0 13               | 4775.7491 | 0.0062  | 4 3 2              | 3 2 1                 | 5196.3279 | -0.0054 |
| 17 2 16            | 16 2 15               | 5706.2845 | 0.0016  | 15 1 15            | 14 0 14               | 5059.8485 | 0.0163  | 5 3 3              | 4 2 2                 | 5532.6730 | 0.0027  |
| 17 2 15            | 16 2 14               | 5910.3978 | -0.0068 | 16 1 16            | 15 0 15               | 5348.6395 | -0.0240 | 5 3 2              | 4 2 3                 | 5538.8956 | 0.0006  |
| 19 2 17            | 18 2 16               | 6608.0504 | 0.0071  | 17 1 17            | 16 0 16               | 5642.0419 | 0.0087  | 6 3 4              | 5 2 3                 | 5866.3206 | -0.0006 |
| 20 2 18            | 19 2 17               | 6953.8922 | 0.0044  | 18 1 18            | 17 0 17               | 5939.5603 | -0.0034 | 6 3 3              | 5 2 4                 | 5880.9090 | 0.0038  |
| 12 3 10            | 11 3 9                | 4075.5020 | 0.0074  | 24 1 24            | 23 0 23               | 7785.6289 | 0.0078  | 7 3 5              | 6 2 4                 | 6195.8993 | -0.0017 |
| 12 3 9             | 11 3 8                | 4085.3247 | 0.0130  | 13 0 13            | 12 1 12               | 4029.4884 | -0.0039 | 7 3 4              | 6 2 5                 | 6225.1620 | -0.0005 |
| 13 3 11            | 12 3 10               | 4416.0263 | -0.0019 | 14 0 14            | 13 1 13               | 4389.4392 | -0.0042 | 8 3 6              | 7 2 5                 | 6519.8142 | 0.0042  |
| 13 3 10            | 12 3 9                | 4430.5771 | 0.0008  | 16 0 16            | 15 1 15               | 5092.2397 | -0.0049 | 8 3 5              | 7 2 6                 | 6572.5732 | 0.0010  |
| 14 3 12            | 13 3 11               | 4756.4948 | 0.0034  | 18 0 18            | 17 1 17               | 5775.0354 | -0.0048 | 9 3 7              | 8 2 6                 | 6836.3183 | 0.0003  |
| 14 3 11            | 13 3 10               | 4777.3168 | -0.0078 | 19 0 19            | 18 1 18               | 6110.3618 | 0.0076  | 9 3 6              | 8 2 7                 | 6924.2307 | 0.0023  |
| 15 3 13            | 14 3 12               | 5096.7868 | -0.0082 | 24 0 24            | 23 1 23               | 7747.7278 | -0.0016 | 10 3 8             | 9 2 7                 | 7143.6806 | -0.0014 |
| 16 3 14            | 15 3 13               | 5436.8386 | -0.0060 | 23 0 23            | 22 1 22               | 7423.9890 | 0.0030  | 10 3 7             | 9 2 8                 | 7281.4369 | 0.0043  |
| 16 3 13            | 15 3 12               | 5475.9384 | 0.0050  | 5 2 4              | 4 1 3                 | 3896.9186 | -0.0120 | 11 3 9             | 10 2 8                | 7440.2815 | -0.0027 |

**Table S5.** Continued.

| $J'K_{-1}'K_{+1}'$ | $J''K_{-1}''K_{+1}''$ | Obs.      | Res.    |
|--------------------|-----------------------|-----------|---------|
| 11 3 8             | 10 2 9                | 7645.7092 | -0.0014 |
| 12 3 10            | 11 2 9                | 7724.7715 | 0.0033  |
| 4 4 0              | 3 3 1                 | 6734.3313 | -0.0036 |
| 4 4 1              | 3 3 0                 | 6734.3313 | -0.0036 |
| 5 4 1              | 4 3 2                 | 7073.1365 | -0.0183 |
| 5 4 2              | 4 3 1                 | 7073.1365 | -0.0183 |
| 6 4 3              | 5 3 2                 | 7411.7984 | 0.0013  |
| 6 4 2              | 5 3 3                 | 7411.9344 | -0.0064 |
| 7 4 3              | 6 3 4                 | 7750.6125 | 0.0109  |
| 7 4 4              | 6 3 3                 | 7750.1623 | -0.0065 |
| 7 3 5              | 7 2 6                 | 3856.1601 | 0.0072  |
| 8 3 6              | 8 2 7                 | 3865.3817 | 0.0143  |
| 9 3 7              | 9 2 8                 | 3878.3090 | -0.0083 |
| 10 1 9             | 9 0 9                 | 4794.1841 | 0.0132  |
| 14 1 13            | 13 0 13               | 6857.9917 | 0.0071  |
| 7 2 5              | 6 1 5                 | 4512.8496 | 0.0074  |
| 9 2 7              | 8 1 7                 | 5118.1866 | 0.0166  |
| 10 2 8             | 9 1 8                 | 5429.0690 | -0.0047 |
